1 *Determinants of Late Initiation for Antenatal Care Follow up Among*  
2 *Pregnant Mothers Attending Public Health Centers at Jimma Town, South*  
3 *West Ethiopia, 2021: Unmatched Case–Control Study.*

4  
5 Mohammed Jihad<sup>1\*</sup>, KifleWoldemichael<sup>2</sup>, YenealemGezehagn<sup>2</sup>,

6 <sup>1</sup>Jimma town health office, Jimma, Ethiopia,

7 <sup>2</sup>Epidemiology Department, Faculty of Public Health, Institute of health, Jimma University,

8 Jimma, Ethiopia,

9 [\\*jihadmoha2005@gmail.com](mailto:jihadmoha2005@gmail.com)

10 **Abstract**

11 **Background**

12 World Health Organization recommends that, a woman without complications should have at  
13 least four antenatal care visits, the first of which should take place during the first trimester (not >  
14 16 weeks). But, high proportion of pregnant women in most of developing countries attended first  
15 ANC at a late time. In Ethiopia, magnitude of late ANC follow up initiation is 64% and in study  
16 area 68.7% however determinants of the problem were not identified particularly in the study  
17 area.

18 **Objective**

19 To identify determinants of late antenatal care initiation among pregnant women attending  
20 antenatal care in public health centers of Jimma town, south west Ethiopia 2021.

21 **Methods**

22  
23 Facility based unmatched case control study was conducted from May 1-30. The cases  
24 (n=177) were mothers who attended their first antenatal care visit at  $\geq 16$  weeks of  
25 gestational age and the controls (n=177) were mothers who attended their first antenatal care  
26 visit at  $< 16$  weeks of gestational age during the data collection period. Data was collected  
27 through face to face interview using pre tested structured questionnaire. Descriptive and summary  
28 statistics was done. Bivariable and multivariable logistic regression analysis was done using  
29 SPSS version 21.0 to identify candidate variables at P-value  $< 0.25$  and determinants of late ANC  
30 initiation at P-value  $< 0.05$  respectively.

31 **Results**

32 The current study identified that, being age  $> 25$  years (AOR= 2.623, 95% CI 1.059 - 6.496),  
33 poor knowledge about ANC (AOR= 3.856, 95% CI 1.266-11.750), lack of history of abortion  
34 (AOR= 3.326, 95% CI 1.082-10.224), place of previous delivery (AOR=3.926, 95%CI 1.023-  
35 15.063), recognizing pregnancy through missed period(AOR= 3.631, 95% CI 1.520-8.674),  
36 pregnancy related pain(AOR= 3.499, 95% CI 1.423 - 8.603) and lack of family support  
37 (AOR=2.647, 95% CI 1.092-6.415) were determinants of late ANC initiation.

38 **Conclusion**

39 Being age  $> 25$  years, poor knowledge about ANC, lack of history of abortion, place of previous  
40 delivery, recognizing pregnancy through missed period, pregnancy related pain, and lack of  
41 family support during ANC booking were determinants of late ANC initiation. Health facilities  
42 and respective health care providers should provide health education at facility level regularly  
43 with due attention to late ANC initiation.

44

45 **Key words:** *Late Antenatal care, Determinant, Jimma Town.*

## 46 **Introduction**

47 Late ANC initiation is the first ANC visit at  $\geq 16$  weeks of gestational age for the current  
48 pregnancy. Under normal condition, World Health Organization recommends that a woman  
49 without complications should have at least four antenatal care visits, the first of which should  
50 take place during the first trimester (not  $> 16$  weeks) (1). There are a number of risk factors  
51 associated with late antenatal booking and these may have an impact on maternal and foetal  
52 wellbeing, resulting in increased mortality and morbidity (1–4).

53

54 Worldwide there is a big discrepancy in the prevalence of late ANC follow up among  
55 pregnant mothers, ranging from 27.5 to 88% in developed and developing countries  
56 respectively. Delayed initiation of antenatal follow up is the predominant problems  
57 throughout Sub Saharan African (SSA) countries including Ethiopia resulting in failure of  
58 accomplishment of the World Health Organization recommendation (5,6).

59

60 According to the systematic review and meta-analysis conducted on delayed initiation of  
61 ANC and associated factors in Ethiopia, the pooled estimate of the magnitude of delayed  
62 initiation of ANC in Ethiopia was 64% (7). High proportion of the pregnant women (60.5%)  
63 initiated antenatal care after four months of gestation (8–10). Mini EDHS 2014 revealed that,  
64 only 18% of pregnant women initiated early for first ANC services (11). EDHS 2016 also  
65 showed that, 42% of first ANC attendants were initiated lately (12). Study conducted in  
66 Jimma town, Ethiopia showed that 68.7% of participants initiated for their first ANC  
67 lately (13).

68

69 Late ANC registration and inadequate ANC attendance predispose pregnant women to  
70 increased risk of maternal morbidity and mortality and poor pregnancy outcome. Women  
71 who book late for ANC lose the opportunity to benefit from early detection and effective  
72 treatment of some disease conditions that may impair their health and that of their babies (14).  
73 Low birth weight, low Apgar scores as well as the incidence of maternal anaemia and  
74 pregnancy induced hypertension (PIH) were found to be related to late ANC booking (15).

75

76 Adverse pregnancy outcomes can be minimised or avoided altogether if antenatal care is  
77 received early in the pregnancy and continued through delivery. But every day in 2017, about  
78 808 women died due to complications of pregnancy and child birth. MMR in the world's

79 least developed countries (LDCs) is high, estimated at 415 maternal deaths per 100 000 live  
80 births, which is more than 40 times higher than MMR in Europe, and almost 60 times higher  
81 than in Australia and New Zealand. Almost all of these deaths occurred in low-resource  
82 settings, and most could have been prevented. The primary causes of death are haemorrhage,  
83 hypertension, infections, and indirect causes, mostly due to interaction between pre-existing  
84 medical conditions and pregnancy(16,17).

85

86 Many studies reported that, late initiation of ANC was highly significant among less educated  
87 mother, unplanned pregnancy, age >26 years of mothers, unemployed women, husband's  
88 education, women's autonomy, knowledge on ANC, partner involvement, past pregnancy  
89 complication history, parity, anxiety of being pregnant, monthly income, place of residence,  
90 revealing pregnancy, means of checking pregnancy, late recognition of pregnancy, distance  
91 of health facility, place of previous delivery and not having experience of ANC(7,8,18–22).

92

93 In Ethiopia many studies indicated that, ANC utilization during the first trimester is low and  
94 most pregnant women who attend ANC come too late for their first ANC visit ranges from 40  
95 to 60%. Due to this reason, only four in 10 women (43%) had four or more ANC visits for  
96 their most recent live birth. According to Ethiopian EDHS report; the ANC service coverage  
97 was 41%, among those 23% of them initiated late for ANC (3,11).

98

99 Despite having made considerable progress on an international level in terms of increasing  
100 the accessibility and use of antenatal care, the first consultation usually occurs at a late stage  
101 of pregnancy(23). Annual report of Jimma town 2019/20 from DHIS2 also showed that high  
102 proportion 64% of first ANC attendants were initiated lately.

103

104 In various parts of Ethiopia, numerous studies have been undertaken and written. However,  
105 the majority of them were designed to be cross-sectional, making it impossible to determine a  
106 causal association between the outcome and exposure variables. In addition, the determinants  
107 of late initiation for ANC are not the same across different cultures, socio economic status  
108 and access to institution within a society. As a result, the aim of this research is to find  
109 potential determinants of late ANC initiation among pregnant women attending ANC in  
110 public health centers in Jimma town, south west Ethiopia, in the year 2021.

111

112

## 113 **Methods and Materials**

### 114 **Study area, design and period**

115 This study was conducted in Oromia Regional State, Jimma Town, which is 346 km far from  
116 Addis Ababa to the southwest part of the country. Based on the 2007 national census, the  
117 estimated population of the Jimma town in 2020/21 is 220,609. Of these, 112,511 (51%) are  
118 females and 7655 Pregnant mothers. The town has 17 kebeles; 4 rural and 13 urban kebeles.  
119 There are 4 health centers, 2 public Hospitals and 3 private Hospitals in Jimma town. The  
120 data collection period was from May 1- 30, 2021.

121 Facilitybased unmatched casecontrol studydesign wasused

### 122 **Population**

123 Source population were all pregnant women attending ANC in Jimma town public health  
124 centers during the study period. Study population for cases were all eligible pregnant women  
125 who came for first antenatal care services at  $\geq 16$  weeks of gestational age and study  
126 population for controls were all eligible pregnant women who came for first antenatal care  
127 services at  $< 16$  weeks of gestational age in Jimma town public health centers during the study  
128 period.

### 129 **Sample size and sampling procedure**

130 Sample size was calculated by Epi info Version 7.0.8.3 using double population proportion  
131 formula by considering proportion of mothers who had unplanned pregnancy among controls  
132 was 8.2% (main predictor variable with AOR = 2.73 and P-value  $< 0.000$ ) from similar study  
133 conducted in Addis Ababa, Ethiopia (24). In addition 95% CI, 80% power and 1:1 control to  
134 case ratio. Accordingly by adding 10% none response rate, the final sample size were 177  
135 cases and 177 controls. There are four public health centers in Jimma town and the total  
136 sample size was proportionately allocated across all health centers according to their average  
137 three month's cases load. (Figure 1)

138

### 139 **Figure 1: Proportional allocation of sample size among health centers in Jimma Town** 140 **2021**

141

142 **Selection of cases:** for a women's who came for First ANC gestational age of the pregnancy  
143 was determined using LMP. Pregnant women's with gestational age of  $\geq 16$  weeks (cases)  
144 was identified and selected using systematic random sampling technique. The random start of  
145 the case selection was 4 and the interval was 2.

146 The interval was determined by average three month's cases flow divided by the sample size  
147 allocated to each facility, which is equal to two. The first mother was identified using simple  
148 random sampling and the rest were selected every interval until the allocated sample size was  
149 reached.

150

151 **Selection of controls:** Control selection was based on case selection; for each case selected,  
152 the immediate pregnant women with a gestational age < 16 weeks (control) was identified  
153 and selected as a control.

## 154 **Measurement of Variables**

155

156 **Socio-economic status:** It was measured by using the information from the asset based  
157 wealth index & principal component analysis (PCA) on SPSS was used for its analysis; in  
158 that the family's wealth was grouped in quintiles (from lowest to highest). The quintiles was  
159 Q1= Poor socio-economic level, Q2=Medium socio-economic level, and Q3= Wealthiest.

160

161 **Knowledge:** Measured based on five multiple choice questions and for correct response, 1  
162 score was given, for incorrect or don't know the answer, 0 was given. The cumulative score  
163 ranges from 0 to 5. Finally, by using modified Bloom's cut off point, categorization was  
164 made as, 80-100% good knowledge, 50-79% moderate and <50% poor knowledge.

165

166 **Service quality:** Measured by using Likert's scale based on satisfaction level of the mothers  
167 on health service delivery. Four questions were rated by mothers and score was given starting  
168 from 5-1, the cumulative score ranges from 4-20 then using modified Bloom's cut off point;  
169 80-100% was considered as good quality, 50-79% moderate quality and <50% indicates poor  
170 quality.

## 171 **Data collection tools and procedures**

172 Structured questionnaire that has different sections was developed from different literatures.

173 The questionnaire was first prepared in English and translated into Afan Oromo and back  
174 translated to English to check consistency of the language. Data collectors were eight  
175 diploma midwives and one BSc midwife supervisor has followed day to day activities. Two  
176 days training was provided on objectives of the study, subject identification and contents of  
177 questionnaire for data collectors, supervisor and data clerks. Data was collected through face  
178 to face interview at waiting area following the ANC consultation at ANC unit. Respondents

179 were informed about the purpose of the study, privacy, confidentiality and information given  
180 by each respondent was kept in a safe box and name was not recorded. Data was checked by  
181 the supervisor at the end of each day during the data collection period, whether the  
182 questionnaires were complete and consistent. After data collection, questionnaires were  
183 sorted into two groups and numbered as 1 and 2 controls and cases respectively.

#### 184 **Data analysis procedure**

185 Data was entered into EPI-data version 4.6 and exported to SPSS version 21.0 for analysis.  
186 Descriptive statistics was used to summarize the data according to the variable type.  
187 Bivariable and multivariable logistic regression were done. Each variable with the outcome  
188 of interest at  $p < 0.25$  in the bivariable analysis was candidate for multivariable analysis.  
189 Multi-collinearity was checked for all candidate variables using VIF (Variance Inflation  
190 Factor) at the cut of point 10 and Model goodness of fit using the Hosmer & Lemeshow test at  
191  $p$  value  $> 0.05$  was done. In the multivariable analysis,  $P < 0.05$  declared statistically  
192 significant. AOR with its respective 95%CI was calculated to measure the association  
193 between independent variables and a dependent variable.

#### 194 **Ethical Consideration**

195 Ethical clearance was obtained from ethical review board (IRB) of Jimma University. Based  
196 on the ethical clearance, an official letter was obtained from the Institute of Health, Faculty  
197 of Public Health, Department of Epidemiology. An official letter was submitted to the Jimma  
198 town health office and health centers. After explaining the purpose of the study, permission  
199 was obtained from the head of Jimma town health office and managers of health centers.  
200 Respondents were informed about the purpose of the study, the importance of their  
201 participation, and the right to withdraw at any time if they want and about privacy and  
202 confidentiality of the information given by each respondent kept properly and that name was  
203 not recorded. Written consent was obtained from each respondent.

## 204 **Results**

### 205 **Socio demographic characters**

206  
207 In the current study 177 cases and 177 controls participated with a response rate of 100%.  
208 About 151(85.3%) of cases and 162 (91.5%) controls were urban residents. The distribution  
209 of religion types among cases and controls was nearly the same. Regarding age of the  
210 mothers, 96(54.2%) and 43(24.3%) of cases and of controls were age  $>25$  years respectively.

211

212 Almost all cases 168 (94.9%) and controls 167 (94.4%) were married. One hundred twenty  
 213 eight cases (72.3%) and 111(62.7%) controls were unemployed. Regarding to husband  
 214 occupation, 110(64%) of cases and 134 (76.6%) of controls were employed. Concerning  
 215 socio economic status, 63(35.6%) of cases and 55(31.1%) controls were in the category of  
 216 poorest socio-economic status. While 57(32.2%) of cases and 61(34.5%) controls were  
 217 wealthiest (Table 1).

218  
 219 *Table 1: Socio demographic characteristics of mothers for the research conducted on determinants*  
 220 *of late ANC initiation, in Jimma town, South West Ethiopia, 2021.*

221

| Variables                      | Categories           | Case n= 177 | Control n =177 | P-Value | COR(95% CI)        |
|--------------------------------|----------------------|-------------|----------------|---------|--------------------|
| Residence                      | Urban                | 151(85.3%)  | 162(91.5%)     | 1       |                    |
|                                | Rural                | 26(14.7%)   | 15(8.5%)       | .271    | 0.538(0.274-1.054) |
| Religion                       | Muslim               | 126(71.2%)  | 128(72.3%)     | 1       |                    |
|                                | Orthodox             | 38(21.5%)   | 37(20.9%)      | .872    | 0.958(0.573-1.604) |
|                                | Protestant           | 11(6.2%)    | 12(6.8%)       | .870    | 1.074(0.457-2.523) |
|                                | Other                | 2(1.1%)     | 0(0%)          | .999    | .000               |
| Age of mother                  | >25                  | 96(54.2%)   | 43(24.3%)      | .000    | 3.693(2.347-5.811) |
|                                | <=25                 | 81(45.8%)   | 134(75.7%)     | 1       |                    |
| Family size                    | >3                   | 76(42.9%)   | 39(22%)        | .000    | 0.376(0.236-.597)  |
|                                | <=3                  | 101(57.1%)  | 138(78%)       | 1       |                    |
| Marital status                 | Single               | 7(4.0%)     | 7(4.0%)        | .991    | 1.006(0.345-2.931) |
|                                | Divorced/widowed     | 2(1.1%)     | 3(1.7%)        | .655    | 1.509(0.249-9.147) |
|                                | Married              | 168(94.9%)  | 167(94.4%)     | 1       |                    |
| Occupational status of mother  | Unemployed           | 128(72.3%)  | 111(62.7%)     | .054    | 1.553(0.99-2.432)  |
|                                | Employed             | 49(27.7%)   | 66(37.3%)      | 1       |                    |
| Occupational status of husband | Unemployed           | 62(36%)     | 41(23.4%)      | .011    | 1.842(1.153-2.942) |
|                                | Employed             | 110(64%)    | 134(76.6%)     | 1       |                    |
| Educational status of mother   | Can't read and write | 44(24.9%)   | 16(9%)         | .000    | 4.583(2.284-9.197) |
|                                | primary (1-8)        | 94(53.1%)   | 96(54.2%)      | .002    | 2.809(1.482-5.321) |

| Variables                     | Categories                 | Case n= 177 | Control n =177 | P-Value | COR(95% CI)        |
|-------------------------------|----------------------------|-------------|----------------|---------|--------------------|
|                               | Secondary (9-12) and above | 39(22%)     | 65(36.7%)      | 1       |                    |
| Educational status of husband | Can't read and write       | 26(15.1%)   | 15(8.6%)       | .002    | 3.026(1.485-6.164) |
|                               | primary (1-8)              | 87(50.6%)   | 57(32.6%)      | .728    | 1.136(0.554-2.328) |
|                               | secondary (9-12) and above | 59(34.3%)   | 103(58.9%)     | 1       |                    |
| Socio economic status         | Poorest                    | 56(31.6%)   | 68(38.4%)      | .322    | 1.495(0.898-2.486) |
|                               | Moderate                   | 57(32.2%)   | 57(32.2%)      | .432    | 1.231(0.733-2.067) |
|                               | Wealthiest                 | 64(36.2%)   | 52(29.4%)      | 1       |                    |

222

### 223 **Knowledge status of respondents about ANC**

224 Seventy-seven (43.5%) of cases and 37(20.9%) controls have poor knowledge about ANC.

225 Proportion of moderate knowledge among cases and controls was 67(37.9%) and 76 (42.9%)

226 respectively. Thirty three (18.6%) of cases and 64(36.2%) of controls have good knowledge

227 about ANC (Figure 2).

228

229 **Figure 2: Knowledge status of mothers among case and control groups, Jimma Town,**  
 230 **South West Ethiopia, 2021**

231

### 232 **Maternal and obstetric characteristics of respondents**

233 Proportion of multigravida among cases and controls was 112(63.3%) and 81(45.8%)

234 respectively. Sixty five (36.7%) of cases and 96(54.2%) controls were primi-gravida.

235 Mothers were asked if they have had history of abortion and 18(16.1%) of cases and

236 28(34.6%) controls reported history of abortion. Concerning place of delivery for the last

237 previous pregnancy, 25(23.6%) of cases and 7(10%) of controls gave birth at their home.

238 Three fourth 133(75.1%) of cases and 68(38.4%) of controls recognized their pregnancy

239 through missed period. Regarding to revealing being pregnant to others, 137(77.4%) of cases

240 and 169(95.5%) of controls revealed their pregnancy (Table 2).

241

242 *Table 2: Bivariable Analysis of Maternal and Obstetric factors associated with late ANC initiation,*  
 243 *in Jimma town, South West Ethiopia, 2021.*

| Variables | Category     | Case (n=177) | Control(n=177) | P-Value | COR(95% CI)       |
|-----------|--------------|--------------|----------------|---------|-------------------|
| Gravidity | Multigravida | 112(63.3%)   | 81(45.8%)      | .001    | .490(0.320-0.749) |
|           | Primigravida | 65(36.7%)    | 96(54.2%)      | 1       |                   |



| Variables                                         | Category         | Case (n=177) | Control(n=177) | P-Value | COR(95% CI)         |
|---------------------------------------------------|------------------|--------------|----------------|---------|---------------------|
| History of abortion                               | No               | 94(83.9%)    | 53(65.4%)      | .003    | 2.759(1.396-5.452)  |
|                                                   | Yes              | 18(16.1%)    | 28(34.6%)      | 1       |                     |
| ANC history                                       | No               | 20(17.9%)    | 10(12.3%)      | .299    | 1.543(0.680-3.504)  |
|                                                   | Yes              | 92(82.1%)    | 71(87.7%)      | 1       |                     |
| Parity                                            | >=1              | 106(59.9%)   | 70(39.5%)      | .197    | 1.492(0.813-2.739)  |
|                                                   | Parity 0         | 71(40.1%)    | 107(60.5%)     | 1       |                     |
| Place of delivery for the last previous pregnancy | Home             | 25(23.6%)    | 7(10%)         | .026    | 2.778(1.129-6.835)  |
|                                                   | Health facility  | 81(76.4%)    | 63(90%)        | 1       |                     |
| Pregnancy status (planned/unplanned)              | No               | 66(37.3%)    | 17(9.6%)       | .000    | 5.596(3.116-10.050) |
|                                                   | Yes              | 111(62.7%)   | 160(90.4%)     | 1       |                     |
| Revealing being pregnancy to others               | No               | 40(22.6%)    | 8(4.5%)        | .000    | 6.168(2.794-13.615) |
|                                                   | Yes              | 137(77.4%)   | 169(95.5%)     | 1       |                     |
| Pregnancy recognition means                       | By missed period | 133(75.1%)   | 68(38.4%)      | .000    | 4.845(3.071-7.644)  |
|                                                   | By Urine test    | 44(24.9%)    | 109(61.6)      | 1       |                     |
| Current pregnancy related pain before initiation  | Yes              | 87(49.2%)    | 48(27.1%)      | .000    | 2.598(1.667-4.048)  |
|                                                   | No               | 90(50.8%)    | 129(72.9%)     | 1       |                     |
| GA of pregnancy recognition                       | >=8 weeks        | 150(84.7%)   | 132(74.6%)     | .018    | 1.894(1.113-3.222)  |
|                                                   | <8 weeks         | 27(15.3%)    | 45(25.4%)      | 1       |                     |
| History of CS delivery                            | No               | 98(92.5%)    | 58(82.9%)      | .026    | 2.778(1.129-6.835)  |
|                                                   | Yes              | 8(7.5%)      | 12(17.1%)      | 1       |                     |

244 **Health service related factors**

245 Regarding service quality, 82(46.3%) of cases and 84(47.5%) controls rated service quality as  
 246 moderate. Fifty two (29.4%) and 29(16.4%) of cases and controls rated service quality as  
 247 poor respectively. Concerning distance from health facility, 118(66.7%) of cases and  
 248 130(73.4%) of controls were near to health facility (Table 3).

249

250 *Table 3: Bivariable Analysis of Health service related factors associated with late ANC initiation, in*  
 251 *Jimma town, South West Ethiopia, 2021*

| Variables                     | Category | Case (n=177) | Control (n=177) | P – value | COR (95% CI)       |
|-------------------------------|----------|--------------|-----------------|-----------|--------------------|
| Service quality               | Poor     | 52(29.4%)    | 29(16.4%)       | .001      | 2.669(1.470-4.845) |
|                               | Moderate | 82(46.3%)    | 84(47.5%)       | .029      | 1.837(1.063-3.173) |
|                               | Good     | 43(24.3%)    | 64(36.2%)       | 1         |                    |
| Distance from health facility | Far      | 59(33.3%)    | 47(26.6%)       | .164      | 1.383(0.876-2.184) |
|                               | Near     | 118(66.7%)   | 130(73.4%)      | 1         |                    |

252

253 **Socio-cultural characteristics**

254 One hundred twenty-six (71.2%) of cases and 158 (89.3%) of controls made decisions to  
 255 book for ANC follow up in consultation with their husbands. Regarding family support,  
 256 118(66.7%) of cases and 55(31.1%) controls came to health facility alone during ANC  
 257 initiation (Table 4).

258 *Table 4: Socio-cultural characteristics of respondents, Jimma Town, South West Ethiopia 2021*

| Variables                       | Categories          | Case (n= 177) | Control (n= 177) | P-Value | COR (95%CI)        |
|---------------------------------|---------------------|---------------|------------------|---------|--------------------|
| Decision making to book for ANC | My Self             | 45(25.4%)     | 16(9%)           | .000    | 3.527(1.904-6.534) |
|                                 | with Other relative | 6(3.4%)       | 3(1.7%)          | .656    | 1.406(0.314-6.294) |
|                                 | with my husband     | 126(71.2%)    | 158(89.3%)       | 1       |                    |
| Family support                  | Alone               | 118(66.7%)    | 55(31.1%)        | .000    | 5.185(3.259-8.248) |
|                                 | with Other relative | 11(6.2%)      | 6(3.4%)          | .768    | 1.170(0.412-3.327) |
|                                 | with my husband     | 48(27.1%)     | 116(65.5%)       | 1       |                    |

259 **Determinants of late initiation of ANC follow-up**

260 Mothers aged >25 years were 2.623 times more likely to initiate ANC follow-up late as  
 261 compared to their counterparts (AOR= 2.623, 95% CI 1.059 - 6.496). Pregnant mothers who  
 262 have poor knowledge about ANC were 3.856 times more likely to book late for ANC as  
 263 compared to those who have had good knowledge (AOR= 3.856, 95% CI 1.266-  
 264 11.750).Mothers who hadn't history of abortion were 3.326 times more likely to book late for  
 265 ANC follow-up as compared to those who had an abortion history (AOR= 3.326, 95% CI  
 266 1.082 -10.224). Mothers who gave birth at their home during the last previous delivery were  
 267 3.9 times more likely to book late for ANC as compared to mothers who gave birth at health  
 268 facility (AOR=3.926, 95%CI 1.023-15.063).

269  
 270 Pregnant mothers who recognized their pregnancy by missed period were 3.631 times more  
 271 likely to book late for ANC follow-up as compared to those recognized by urine test (AOR=  
 272 3.631, 95% CI 1.520-8.674). Mothers who wait until they feel ill of pregnancy were 3.499  
 273 times more likely to book late for ANC follow-up as compared to those who initiated without  
 274 feeling pain of pregnancy (AOR= 3.499, 95% CI 1.423 - 8.603). Mothers who came to health  
 275 facilities alone during ANC booking were 2.647 times more likely to initiate late for ANC  
 276 follow up as compared to those came with their husbands (AOR=2.647, 95% CI 1.092 -  
 277 6.415) (Table 5).

278

279 *Table 5: Independent predictors of late ANC initiation, Jimma Town, South West Ethiopia 2021*

| <b>Variables</b>                                         | <b>Case(n=177)</b> | <b>Control(n=177)</b> | <b>COR (95% CI)</b>  | <b>AOR (95% CI)</b>   |
|----------------------------------------------------------|--------------------|-----------------------|----------------------|-----------------------|
| <b>Age of mother</b>                                     |                    |                       |                      |                       |
| >25                                                      | 96(54.2%)          | 43(24.3%)             | 3.693 (2.347-5.811)* | 2.623(1.059-6.496)**  |
| <=25                                                     | 81(45.8%)          | 134(75.7%)            | 1                    |                       |
| <b>Knowledge about ANC</b>                               |                    |                       |                      |                       |
| Poor Knowledge                                           | 77(43.5%)          | 37(20.9%)             | 4.036(2.272-7.170)*  | 3.856(1.266-11.750)** |
| Moderate Knowledge                                       | 67(37.9%)          | 76(42.9%)             | 2.361(1.415-3.937)*  | 1.98(0.424-3.381)     |
| Good Knowledge                                           | 33(18.6%)          | 64(36.2%)             | 1                    |                       |
| <b>History of abortion</b>                               |                    |                       |                      |                       |
| No                                                       | 94(83.9%)          | 53(65.4%)             | 2.759 (1.396-5.452)* | 3.326(1.082-10.224)** |
| Yes                                                      | 18(16.1%)          | 28(34.6%)             | 1                    |                       |
| <b>Place of delivery for the last previous pregnancy</b> |                    |                       |                      |                       |
| Home                                                     | 25(23.6%)          | 7(10%)                | 2.778 (1.129-6.835)* | 3.926(1.023-15.063)** |
| Health facility                                          | 81(76.4%)          | 63(90%)               | 1                    |                       |
| <b>Pregnancy recognition Means</b>                       |                    |                       |                      |                       |
| By missed period                                         | 133(75.1%)         | 68(38.4%)             | 4.845 (3.071-7.664)* | 3.631(1.520-8.674)**  |
| By Urine test                                            | 44(24.9%)          | 109(61.6)             | 1                    |                       |
| <b>Current pregnancy related pain before initiation</b>  |                    |                       |                      |                       |
| Yes                                                      | 87(49.2%)          | 48(27.1%)             | 2.598 (1.667-4.048)* | 3.499(1.423-8.603)**  |
| No                                                       | 90(50.8%)          | 129(72.9%)            | 1                    |                       |
| <b>Family support</b>                                    |                    |                       |                      |                       |
| Alone                                                    | 118(66.7%)         | 55(31.1%)             | 5.185(3.259-8.248)*  | 2.647 (1.092-6.415)** |
| with Other relative                                      | 11(6.2%)           | 6(3.4%)               | 1.170(0.412-3.327)   | 1.323(0.133-13.139)   |
| with my husband                                          | 48(27.1%)          | 116(65.5%)            | 1                    |                       |

\* Significant variables in bivariable analysis, \*\* Significant variables in Multivariable analysis

## 280 Discussion

281 The current study showed that, being age > 25 years, poor knowledge about ANC, lack of  
 282 history of abortion, previous home delivery, recognizing pregnancy through missed period,  
 283 current pregnancy related pain before initiation, and lack of family support during  
 284 ANC booking were determinants of late ANC initiation.

285

286 Pregnant mothers aged >25 were 2.6 times more likely to book late for ANC follow-up as  
 287 compared to their counterparts. This result is consistent with the studies done in  
 288 Debremarkos, Kembata, and East Wellega, Ethiopia (5,25,26). The reason might be due to  
 289 that young women have more health seeking behaviour and information about the importance  
 290 of early antenatal care booking than older women.

291

292 Pregnant mothers who have had poor Knowledge about ANC were 3.38 times more likely to  
293 book late for ANC follow up as compared to those who have had good knowledge. This  
294 finding is in line with the study conducted in Tigray, Ethiopia (24). This could be explained  
295 by the fact that mothers with poor knowledge might not have awareness about the correct  
296 time for ANC booking, frequency of ANC visits, and the importance of ANC follow up both  
297 for the mother and the foetus. In the current study, pregnant mothers who had no history of  
298 abortion were 3.3 times more likely to book late for ANC follow up as compared to their  
299 counterparts. The study finding is supported by the study done in the United Arab Emirates  
300 and in Ethiopia(20,28). It could be explained by the fact that, mothers who have a history of  
301 abortion were more likely to initiate early for ANC follow up due to fear of recurrence of the  
302 event as well as they might got information about ANC follow up.

303

304 The finding showed that, mothers who gave birth at their home during the last previous  
305 delivery were 3.9 times more likely to book late for ANC follow up as compared to those  
306 who gave birth at health institution during previous delivery. This finding is in line with the  
307 study conducted in Ethiopia (21). It might be due to mothers who gave birth at the health  
308 facility during previous delivery benefitted and get information about ANC follow up and  
309 appropriate booking time. Mothers who recognized their pregnancy through missed period  
310 were 3.6 times more likely to book for ANC late as compared to mothers who recognized  
311 their pregnancy by urine test. Similar finding was also reported in studies conducted in North  
312 Ethiopia (5,29,30). Mothers who recognize their pregnancy through urine test might be more  
313 likely to practice health care seeking and more likely to accept modern medical care follow  
314 up than those who recognized via missed period. On the other hand, mothers who recognized  
315 pregnancy by missed period were most probably after missing one or two cycles and thereafter,  
316 they might be reluctant to start ANC soon(29).

317

318 Pregnant mothers who wait until they feel ill of pregnancy to start ANC follow up were about  
319 3.5 times more likely to book for ANC follow up late as compared to their counterparts. This  
320 finding is consistent with the study conducted in Addis Ababa, Ethiopia(31). The possible  
321 explanation could be due to the wrong perception of ANC follow up as a curative rather than  
322 preventive and waiting pregnancy related medical problem to book for ANC. Pregnant  
323 mothers who came alone to health facilities during ANC booking were 2.64 more likely to  
324 initiate ANC follow up lately as compared to those accompanied by their husbands. This  
325 finding is supported by the study done in Tanzania and Ethiopia (9,19,32). This could be due

326 to a lack of encouragement from husbands, which may deter women from obtaining early  
327 ANC care.

328

329 The current study showed that, family size, parity, pregnancy status and revealing being  
330 pregnancy to others were not significantly associated with late ANC booking. Family size has  
331 no statistically significant relationship with late ANC booking. The result is different from  
332 the study conducted in sub-Saharan Africa and Cameroon (33,34). It might be due to  
333 difference in socio demographic characteristics of the study participants in two study areas.

334

335 Contrary to study conducted in Cameroon and Boke Woreda, Ethiopia(18,36) parity was not  
336 shown to be linked with late ANC initiation. It might be due to the distribution of multipara  
337 and nulliparous among cases and controls were nearly similar and hidden the impacts of  
338 parity on late ANC follow up initiation. Pregnancy status was another insignificant variable  
339 in the current study. In contrast, the finding is different from studies conducted in Kembata  
340 and Gonder, Ethiopia(25,27) In the current study, the majority of respondents were married  
341 and probability of unplanned pregnancy is low. So that, fewer unplanned pregnancies among  
342 participants was the reason.

### 343 **Limitations**

344 Misclassification bias might also be introduced since gestational age was determined using  
345 LMP based on the women's memory. In addition, the current study focused solely on public  
346 health centers in Jimma town, with no mentions of public hospitals, private clinics, or private  
347 hospitals.

### 348 **Conclusion and recommendations**

349 The study identified that, being age > 25 years, poor knowledge about ANC, previous home  
350 delivery, recognizing pregnancy through missed period, current pregnancy related pain before  
351 initiation, and lack of family support during ANC booking were determinants of late ANC  
352 initiation in the current study. Health care providers should provide health education at facility  
353 level regularly with due attention to late initiation of ANC, eligibility of all pregnant mothers  
354 regardless of feeling pregnancy related medical problems. While providing health education,  
355 special consideration should be given for mothers aged > 25 years.

## 356 **Acknowledgment**

357 We would like to express our heartfelt appreciation to all participants of the study, Jimma  
358 University, and Jimma town health office for their unwavering support and dedication.

## 359 **Author Contributions**

360 Conceptualization: Mohammed Jihad, Kifle Woldemichael & Yenealem Gezehagn

361 Data curation: Mohammed Jihad.

362 Formal analysis: Mohammed Jihad

363 Funding acquisition: Mohammed Jihad.

364 Investigation: Mohammed Jihad, Kifle Woldemichael & Yenealem Gezehagn

365 Methodology: Mohammed Jihad, Kifle Woldemichael & Yenealem Gezehagn

366 Project administration: Mohammed Jihad.

367 Resources: Mohammed Jihad

368 Supervision: Mohammed Jihad, Kifle Woldemichael & Yenealem Gezehagn

369 Visualization: Mohammed Jihad, Kifle Woldemichael & Yenealem Gezehagn

370 Writing – original draft: Mohammed Jihad, Kifle Woldemichael & Yenealem Gezehagn

371 Writing – review & editing: Kifle Woldemichael & Yenealem Gezehagn

## 372 **References**

373 1. WHO. WHO ANC Randomized trial: Manual for the implementation of the new  
374 Model, World Health Organization, Geneva, 2002.

375 2. Lincetto O, Mothebesoane S, Gomez P MS. Opportunities for Africa's Newborns.  
376 *Revue de l'infirmière*. 2015. p. 45–6.

377 3. Ethiopian Public Health Institute (EPHI) [Ethiopia] and ICF. Ethiopia Mini  
378 Demographic and Health Survey 2019: Key Indicators. Vol. 53, *Journal of Chemical  
379 Information and Modeling*. 2019. 1689–1699 p.

380 4. WHO. World Health Organization (WHO). WHO Recommendations on Antenatal  
381 Care for a Positive Pregnancy Experience: Summary. Geneva, Switzerland: WHO;  
382 2018. Licence: CC BY-NC-SA 3.0 IGO. WHO/RHR/18.01. Vol. 1. 2018.

383 5. Wolde F, Mulaw Z, Zena T, Biadgo B, Limenih MA. Determinants of late initiation  
384 for antenatal care follow up: the case of northern Ethiopian pregnant women. *BMC  
385 Res Notes* [Internet]. 2018;1–7. Available from: [https://doi.org/10.1186/s13104-018-  
386 3938-9](https://doi.org/10.1186/s13104-018-3938-9)

- 387 6. Emiru AA. Women ' s retention on the Continuum of Maternal Care Pathway in West  
388 Gojjam Zone , Ethiopia□: Multilevel Analysis. *BMC Pregnancy Childbirth*. 2018;1–  
389 32.
- 390 7. Tesfaye G, Loxton D, Chojenta C, Semahegn A, Smith R. Delayed initiation of  
391 antenatal care and associated factors in Ethiopia: A systematic review and meta-  
392 analysis. *Reprod Health*. 2017;14(1).
- 393 8. Gebremeskel F, Dibaba Y, Admassu B. Timing of First Antenatal Care Attendance  
394 and Associated Factors among Pregnant Women in Arba Minch Town and Arba  
395 Minch District, Gamo Gofa Zone, South Ethiopia. *J Environ Public Health*. 2015;
- 396 9. Weldemariam S, Damte A, Endris K, Palcon MC, Tesfay K, Berhe A. Late antenatal  
397 care initiation□: the case of public health centers in Ethiopia. *BMC Res Notes*  
398 [Internet]. 2018;1–6. Available from: <https://doi.org/10.1186/s13104-018-3653-6>
- 399 10. World Health Organization. Trends in maternal mortality: 1990 to 2013. Estimates by  
400 WHO, UNICEF, UNFPA, The World Bank and the United Nations Population  
401 Division. WHO. 2014.
- 402 11. Central Statistical Agency [Ethiopia]. 2014. Ethiopia Mini Demographic and Health  
403 Survey 2014. Addis Ababa, Ethiopia.
- 404 12. Central Statistical Agency (CSA) [Ethiopia] and ICF. 2016. Ethiopia Demographic and  
405 Health Survey 2016. Addis Ababa, Ethiopia, and Rockville, Maryland, USA: CSA and  
406 ICF. [Internet]. 2017. Available from:  
407 <https://dhsprogram.com/pubs/pdf/FR328/FR328.pdf>
- 408 13. Villadsen SF, Tersbøl BP, Negussie D, Gebremariam A, Tilahun A, Friis H, et al.  
409 Antenatal Care Strengthening in Jimma , Ethiopia□: A Mixed-Method Needs  
410 Assessment. *J Environ Public Health*. 2014;2014.
- 411 14. Emelumadu et al: Socio-Demographic Determinants of Maternal Health-Care Service  
412 Utilization Among Rural Women in Anambra State , South East Nigeria. *Ann Med*  
413 *Health Sci Res*. 2014;4(3).
- 414 15. Govender T, Reddy P, Ghuman S. Obstetric outcomes and antenatal access among  
415 adolescent pregnancies in KwaZulu-Natal , South Africa. *South African Fam Pract*  
416 [Internet]. 2018;60(1):1–7. Available from:  
417 <http://doi.org/10.1080/20786190.2017.1333783>
- 418 16. WHO Maternal and reproductive health report:[https://www.who.int/data/gho/data](https://www.who.int/data/gho/data/themes/maternal-and-reproductive-health)  
419 [themes/maternal-and-reproductive-health](https://www.who.int/data/gho/data/themes/maternal-and-reproductive-health). 2021.
- 420 17. Trends in maternal mortality 2000 to 2017: estimates by WHO, UNICEF, UNFPA,

- 421 World Bank Group and the United Nations Population Division. Geneva. 2019.
- 422 18. Yarinbab TE, Gedle MW. Determinants of Antenatal Care Service Utilization during  
423 the First Trimester among Pregnant Women in Boke Woreda , Ethiopia□: A Facility  
424 Based Unmatched Case Control Study. *Curr Trends Biomed Eng Biosci*. 2018;15(1).
- 425 19. Weldearegawi GG, Teklehaimanot BF, Gebru HT. Determinants of late antenatal care  
426 follow up among pregnant women in Easter zone Tigray , Northern Ethiopia , 2018□:  
427 unmatched case – control study. *BMC Res Notes [Internet]*. 2019;12(752). Available  
428 from: <https://doi.org/10.1186/s13104-019-4789-8>
- 429 20. Ali N, Elbarazi I, Alabboud S, Al-maskari F, Loney T. Antenatal Care Initiation  
430 Among Pregnant Women in the United Arab Emirates□: The Mutaba ' ah Study. *Front*  
431 *Public Heal*. 2020;8(211).
- 432 21. Grum T, Brhane E. Magnitude and factors associated with late antenatal care booking  
433 on first visit among pregnant women in public health centers in central zone of Tigray  
434 Region , Ethiopia□: A cross sectional study. *PLoS One*. 2018;13(12).
- 435 22. Ewunetie AA, Munea AM, Meselu BT, Simeneh MM, Meteku BT. DELAY on first  
436 antenatal care visit and its associated factors among pregnant women in public health  
437 facilities of Debre Markos. *BMC Pregnancy Childbirth*. 2018;18(173).
- 438 23. Baguiya A, Coulibaly A, Bagnoa V. Prevalence and Factors Associated with Late First  
439 Antenatal Care Visit in Kaya Health District , Burkina Faso. *Afr J Reprod Health*.  
440 2020;24(2).
- 441 24. Kahasse G and Alemayehu W. Factors associated with late ANC initiation among  
442 pregnant women in select public health centers of Addis Ababa , Ethiopia□:  
443 unmatched case – control study design. *Pragmatic Obs Res*. 2017;8.
- 444 25. Tesfalidet T; Balcha B. Factors Associated with Late Initiation of Antenatal Care  
445 among Pregnant Women Attending Antenatal Clinic at Public Health Centers in  
446 Kembata Tembaro Zone, Southern Ethiopia. *Sci Technol Arts Res J*. 2014;3(2).
- 447 26. Eyasu E, Regea D, Olifan Z and EM. Factors determining late antenatal care booking  
448 and the content of care among pregnant mother attending antenatal care services in  
449 East Wollega administrative zone, West Ethiopia. *Pan African Med Journa*. 2017;
- 450 27. Wolde HF, Tsegaye AT, Sisay MM. Late initiation of antenatal care and associated  
451 factors among pregnant women in Addis Zemen primary hospital , South. 2019;1–8.
- 452 28. Wondwossen L , Abrehet K MT. Magnitude and Associated Factors of Late Booking  
453 for Antenatal Care in Public Clinics in Mother and Child Health. 2015;12(1):1–8.
- 454 29. Gudayu TW. Proportion and Factors Associated with late Antenatal Care Booking



- 455 among Pregnant Mothers in Gondar Town , North West Ethiopia. *Afr J Reprod Health*.  
456 2015;19(2).
- 457 30. Girma T, Seyoum D RT. Factors Associated with Timely Antenatal Care Booking  
458 Among Pregnant Women in Remote Area of Bule Hora District , Southern Ethiopia.  
459 *Int J Women’s Heal*. 2020;12.
- 460 31. Hanna G, Gulema H, Berhane Y. Timing of First Antenatal Care Visit and its  
461 Associated Factors among Pregnant Women Attending Public Health Facilities in  
462 Addis Ababa, Ethiopia. *Ethiop J Health Sci*. 2017;27(1).
- 463 32. Gross K, Alba S, Glass TR, Schellenberg JA, Obrist B. Timing of antenatal care for  
464 adolescent and adult pregnant women in south-eastern Tanzania. *BMC Pregnancy*  
465 *Childbirth* [Internet]. 2012;12(1):16. Available from:  
466 <http://www.biomedcentral.com/1471-2393/12/16>
- 467 33. Njamen TN, Tchounzou R, Tamambang R, Ngowe MN. Determinants Of Delayance  
468 In The First Antenatal Consultation In A District Hospital In Sub Saharan Africa.  
469 *African J Integr Heal*. 2017;7(2).
- 470 34. Tolefac PN, Halle-ekane GE, Agbor VN, Sama CB, Ngwasiri C, Tebeu PM. Why do  
471 pregnant women present late for their first antenatal care consultation in Cameroon?   
472 *Matern Heal Neonatol Perinatol*. 2017;
- 473 35. Ebonwu J, Mumbauer A, Uys M, Wainberg ML, Medina- A. Determinants of late  
474 antenatal care presentation in rural and peri-urban communities in South Africa : A  
475 cross-sectional study. *PLoS One*. 2018;13(3).
- 476 36. Venyuy MA, Cumber SN, Nkfusai CN, Bede F, Ijang YP, Wepngong E, et al.  
477 Determinants to late antenatal clinic start among pregnant women: the case of Saint  
478 Elizabeth General Hospital, Shisong, Cameroon. *Pan African Med Journa*.  
479 2020;35(112).

## 480 **Figures**

481 [S1 Fig](#). Proportional allocation of sample size among health centers in Jimma Town, 2021

482 [S2 Fig](#). Knowledge status of the mothers among case and control groups, Jimma Town, 2021

## 483 **Supporting information**

484 All data will be available from correspondence author based up on request.

485

Health Centers in Jimma town

JimmaHC

Higher Two  
HC

Mendera Kochi  
HC

Becho Bore  
HC

Average three  
month's Cases= 46

Average three  
month's Cases= 125

Average three  
month's Cases= 38

Average three  
month's Cases= 79

Proportional allocation of sample size based on average three month's cases flow

Cases for JHC =  
 $46/288 * 177 = 28$

Cases for H2HC=  
 $125/288 * 177 = 77$

Cases for MKHC=  
 $38/288 * 177 = 23$

Cases for BBHC  
 $= 79/288 * 177 = 49$

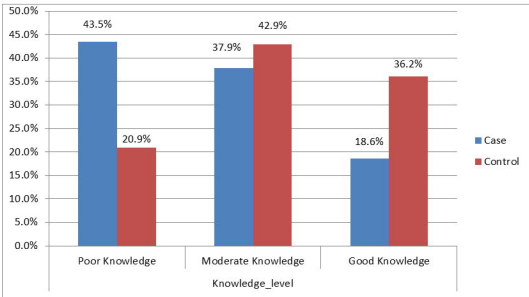

Source: https://medrxiv.org/content/10.1101/2022.01.20.22269582v1.full.pdf
