# *Determinants of Late Initiation for Antenatal Care Follow up Among Pregnant Mothers Attending Public Health Centers at Jimma Town, South West Ethiopia, 2021: Unmatched Case–Control Study.*

Mohammed Jihad<sup>1\*</sup>, KifleWoldemichael<sup>2</sup>, YenealemGezehagn<sup>2</sup>,  
<sup>1</sup>Jimma town health office, Jimma, Ethiopia,  
<sup>2</sup>Epidemiology Department, Faculty of Public Health, Institute of health, Jimma University,  
Jimma, Ethiopia,  
\*[jihadmoha2005@gmail.com](mailto:jihadmoha2005@gmail.com)

## **Abstract**

### **Background**

World Health Organization recommends that, a woman without complications should have at least four antenatal care visits, the first of which should take place during the first trimester (not > 16 weeks). But, high proportion of pregnant women in most of developing countries attended first ANC at a late time. In Ethiopia, magnitude of late ANC follow up initiation is 64% and in study area 68.7% however determinants of the problem were not identified particularly in the study area.

### **Objective**

To identify determinants of late antenatal care initiation among pregnant women attending antenatal care in public health centers of Jimma town, south west Ethiopia 2021.

### **Methods**

Facility based unmatched case control study was conducted from May 1-30. The cases (n=177) were mothers who attended their first antenatal care visit at  $\geq 16$  weeks of gestational age and the controls (n=177) were mothers who attended their first antenatal care visit at  $< 16$  weeks of gestational age during the data collection period. Data was collected through face to face interview using pre tested structured questionnaire. Descriptive and summary statistics was done. Bivariable and multivariable logistic regression analysis was done using SPSS version 21.0 to identify candidate variables at P-value  $< 0.25$  and determinants of late ANC initiation at P-value  $< 0.05$  respectively.

### **Results**

The current study identified that, being age  $> 25$  years (AOR= 2.623, 95% CI 1.059 - 6.496), poor knowledge about ANC (AOR= 3.856, 95% CI 1.266-11.750), lack of history of abortion (AOR= 3.326, 95% CI 1.082-10.224), place of previous delivery (AOR=3.926, 95%CI 1.023-15.063), recognizing pregnancy through missed period(AOR= 3.631, 95% CI 1.520-8.674), pregnancy related pain(AOR= 3.499, 95% CI 1.423 - 8.603) and lack of family support (AOR=2.647, 95% CI 1.092-6.415) were determinants of late ANC initiation.

### **Conclusion**

Being age  $> 25$  years, poor knowledge about ANC, lack of history of abortion, place of previous delivery, recognizing pregnancy through missed period, pregnancy related pain, and lack of family support during ANC booking were determinants of late ANC initiation. Health facilities and respective health care providers should provide health education at facility level regularly with due attention to late ANC initiation.

**Key words:** *Late Antenatal care, Determinant, Jimma Town.*

## Introduction

Late ANC initiation is the first ANC visit at  $\geq 16$  weeks of gestational age for the current pregnancy. Under normal condition, World Health Organization recommends that a woman without complications should have at least four antenatal care visits, the first of which should take place during the first trimester (not  $> 16$  weeks) (1). There are a number of risk factors associated with late antenatal booking and these may have an impact on maternal and foetal wellbeing, resulting in increased mortality and morbidity (1–4).

Worldwide there is a big discrepancy in the prevalence of late ANC follow up among pregnant mothers, ranging from 27.5 to 88% in developed and developing countries respectively. Delayed initiation of antenatal follow up is the predominant problems throughout Sub Saharan African (SSA) countries including Ethiopia resulting in failure of accomplishment of the World Health Organization recommendation (5,6).

According to the systematic review and meta-analysis conducted on delayed initiation of ANC and associated factors in Ethiopia, the pooled estimate of the magnitude of delayed initiation of ANC in Ethiopia was 64% (7). High proportion of the pregnant women (60.5%) initiated antenatal care after four months of gestation (8–10). Mini EDHS 2014 revealed that, only 18% of pregnant women initiated early for first ANC services (11). EDHS 2016 also showed that, 42% of first ANC attendants were initiated lately (12). Study conducted in Jimma town, Ethiopia showed that 68.7% of participants initiated for their first ANC lately (13).

Late ANC registration and inadequate ANC attendance predispose pregnant women to increased risk of maternal morbidity and mortality and poor pregnancy outcome. Women who book late for ANC lose the opportunity to benefit from early detection and effective treatment of some disease conditions that may impair their health and that of their babies (14). Low birth weight, low Apgar scores as well as the incidence of maternal anaemia and pregnancy induced hypertension (PIH) were found to be related to late ANC booking (15).

Adverse pregnancy outcomes can be minimised or avoided altogether if antenatal care is received early in the pregnancy and continued through delivery. But every day in 2017, about 808 women died due to complications of pregnancy and child birth. MMR in the world's

least developed countries (LDCs) is high, estimated at 415 maternal deaths per 100 000 live births, which is more than 40 times higher than MMR in Europe, and almost 60 times higher than in Australia and New Zealand. Almost all of these deaths occurred in low-resource settings, and most could have been prevented. The primary causes of death are haemorrhage, hypertension, infections, and indirect causes, mostly due to interaction between pre-existing medical conditions and pregnancy(16,17).

Many studies reported that, late initiation of ANC was highly significant among less educated mother, unplanned pregnancy, age >26 years of mothers, unemployed women, husband's education, women's autonomy, knowledge on ANC, partner involvement, past pregnancy complication history, parity, anxiety of being pregnant, monthly income, place of residence, revealing pregnancy, means of checking pregnancy, late recognition of pregnancy, distance of health facility, place of previous delivery and not having experience of ANC(7,8,18–22).

In Ethiopia many studies indicated that, ANC utilization during the first trimester is low and most pregnant women who attend ANC come too late for their first ANC visit ranges from 40 to 60%. Due to this reason, only four in 10 women (43%) had four or more ANC visits for their most recent live birth. According to Ethiopian EDHS report; the ANC service coverage was 41%, among those 23% of them initiated late for ANC (3,11).

Despite having made considerable progress on an international level in terms of increasing the accessibility and use of antenatal care, the first consultation usually occurs at a late stage of pregnancy(23). Annual report of Jimma town 2019/20 from DHIS2 also showed that high proportion 64% of first ANC attendants were initiated lately.

In various parts of Ethiopia, numerous studies have been undertaken and written. However, the majority of them were designed to be cross-sectional, making it impossible to determine a causal association between the outcome and exposure variables. In addition, the determinants of late initiation for ANC are not the same across different cultures, socio economic status and access to institution within a society. As a result, the aim of this research is to find potential determinants of late ANC initiation among pregnant women attending ANC in public health centers in Jimma town, south west Ethiopia, in the year 2021.

# Methods and Materials

## Study area, design and period

This study was conducted in Oromia Regional State, Jimma Town, which is 346 km far from Addis Ababa to the southwest part of the country. Based on the 2007 national census, the estimated population of the Jimma town in 2020/21 is 220,609. Of these, 112,511 (51%) are females and 7655 Pregnant mothers. The town has 17 kebeles; 4 rural and 13 urban kebeles. There are 4 health centers, 2 public Hospitals and 3 private Hospitals in Jimma town. The data collection period was from May 1- 30, 2021.

Facility based unmatched case control study design was used

## Population

Source population were all pregnant women attending ANC in Jimma town public health centers during the study period. Study population for cases were all eligible pregnant women who came for first antenatal care services at  $\geq 16$  weeks of gestational age and study population for controls were all eligible pregnant women who came for first antenatal care services at  $< 16$  weeks of gestational age in Jimma town public health centers during the study period.

## Sample size and sampling procedure

Sample size was calculated by Epi info Version 7.0.8.3 using double population proportion formula by considering proportion of mothers who had unplanned pregnancy among controls was 8.2% (main predictor variable with AOR = 2.73 and P-value  $< 0.000$ ) from similar study conducted in Addis Ababa, Ethiopia (24). In addition 95% CI, 80% power and 1:1 control to case ratio. Accordingly by adding 10% none response rate, the final sample size were 177 cases and 177 controls. There are four public health centers in Jimma town and the total sample size was proportionately allocated across all health centers according to their average three month's cases load. (Figure 1)

**Figure 1: Proportional allocation of sample size among health centers in Jimma Town 2021**

**Selection of cases:** for a women's who came for First ANC gestational age of the pregnancy was determined using LMP. Pregnant women's with gestational age of  $\geq 16$  weeks (cases) was identified and selected using systematic random sampling technique. The random start of the case selection was 4 and the interval was 2.

The interval was determined by average three month's cases flow divided by the sample size allocated to each facility, which is equal to two. The first mother was identified using simple random sampling and the rest were selected every interval until the allocated sample size was reached.

**Selection of controls:** Control selection was based on case selection; for each case selected, the immediate pregnant women with a gestational age < 16 weeks (control) was identified and selected as a control.

## Measurement of Variables

**Socio-economic status:** It was measured by using the information from the asset based wealth index & principal component analysis (PCA) on SPSS was used for its analysis; in that the family's wealth was grouped in quintiles (from lowest to highest). The quintiles was Q1= Poor socio-economic level, Q2=Medium socio-economic level, and Q3= Wealthiest.

**Knowledge:** Measured based on five multiple choice questions and for correct response, 1 score was given, for incorrect or don't know the answer, 0 was given. The cumulative score ranges from 0 to 5. Finally, by using modified Bloom's cut off point, categorization was made as, 80-100% good knowledge, 50-79% moderate and <50% poor knowledge.

**Service quality:** Measured by using Likert's scale based on satisfaction level of the mothers on health service delivery. Four questions were rated by mothers and score was given starting from 5-1, the cumulative score ranges from 4-20 then using modified Bloom's cut off point; 80-100% was considered as good quality, 50-79% moderate quality and <50% indicates poor quality.

## Data collection tools and procedures

Structured questionnaire that has different sections was developed from different literatures. The questionnaire was first prepared in English and translated into Afan Oromo and back translated to English to check consistency of the language. Data collectors were eight diploma midwives and one BSc midwife supervisor has followed day to day activities. Two days training was provided on objectives of the study, subject identification and contents of questionnaire for data collectors, supervisor and data clerks. Data was collected through face to face interview at waiting area following the ANC consultation at ANC unit. Respondents

were informed about the purpose of the study, privacy, confidentiality and information given by each respondent was kept in a safe box and name was not recorded. Data was checked by the supervisor at the end of each day during the data collection period, whether the questionnaires were complete and consistent. After data collection, questionnaires were sorted into two groups and numbered as 1 and 2 controls and cases respectively.

### **Data analysis procedure**

Data was entered into EPI-data version 4.6 and exported to SPSS version 21.0 for analysis. Descriptive statistics was used to summarize the data according to the variable type. Bivariable and multivariable logistic regression were done. Each variable with the outcome of interest at  $p < 0.25$  in the bivariable analysis was candidate for multivariable analysis. Multi-collinearity was checked for all candidate variables using VIF (Variance Inflation Factor) at the cut of point 10 and Model goodness of fit using the Hosmer & Lemeshow test at  $p \text{ value} > 0.05$  was done. In the multivariable analysis,  $P < 0.05$  declared statistically significant. AOR with its respective 95%CI was calculated to measure the association between independent variables and a dependent variable.

### **Ethical Consideration**

Ethical clearance was obtained from ethical review board (IRB) of Jimma University. Based on the ethical clearance, an official letter was obtained from the Institute of Health, Faculty of Public Health, Department of Epidemiology. An official letter was submitted to the Jimma town health office and health centers. After explaining the purpose of the study, permission was obtained from the head of Jimma town health office and managers of health centers. Respondents were informed about the purpose of the study, the importance of their participation, and the right to withdraw at any time if they want and about privacy and confidentiality of the information given by each respondent kept properly and that name was not recorded. Written consent was obtained from each respondent.

## **Results**

### **Socio demographic characters**

In the current study 177 cases and 177 controls participated with a response rate of 100%. About 151(85.3%) of cases and 162 (91.5%) controls were urban residents. The distribution of religion types among cases and controls was nearly the same. Regarding age of the mothers, 96(54.2%) and 43(24.3%) of cases and of controls were age  $>25$  years respectively.

Almost all cases 168 (94.9%) and controls 167 (94.4%) were married. One hundred twenty eight cases (72.3%) and 111(62.7%) controls were unemployed. Regarding to husband occupation, 110(64%) of cases and 134 (76.6%) of controls were employed. Concerning socio economic status, 63(35.6%) of cases and 55(31.1%) controls were in the category of poorest socio-economic status. While 57(32.2%) of cases and 61(34.5%) controls were wealthiest (Table 1).

*Table 1: Socio demographic characteristics of mothers for the research conducted on determinants of late ANC initiation, in Jimma town, South West Ethiopia, 2021.*

| Variables                      | Categories           | Case n= 177 | Control n =177 | P-Value | COR(95% CI)        |
|--------------------------------|----------------------|-------------|----------------|---------|--------------------|
| Residence                      | Urban                | 151(85.3%)  | 162(91.5%)     | 1       |                    |
|                                | Rural                | 26(14.7%)   | 15(8.5%)       | .271    | 0.538(0.274-1.054) |
| Religion                       | Muslim               | 126(71.2%)  | 128(72.3%)     | 1       |                    |
|                                | Orthodox             | 38(21.5%)   | 37(20.9%)      | .872    | 0.958(0.573-1.604) |
|                                | Protestant           | 11(6.2%)    | 12(6.8%)       | .870    | 1.074(0.457-2.523) |
|                                | Other                | 2(1.1%)     | 0(0%)          | .999    | .000               |
| Age of mother                  | >25                  | 96(54.2%)   | 43(24.3%)      | .000    | 3.693(2.347-5.811) |
|                                | <=25                 | 81(45.8%)   | 134(75.7%)     | 1       |                    |
| Family size                    | >3                   | 76(42.9%)   | 39(22%)        | .000    | 0.376(0.236-.597)  |
|                                | <=3                  | 101(57.1%)  | 138(78%)       | 1       |                    |
| Marital status                 | Single               | 7(4.0%)     | 7(4.0%)        | .991    | 1.006(0.345-2.931) |
|                                | Divorced/widowed     | 2(1.1%)     | 3(1.7%)        | .655    | 1.509(0.249-9.147) |
|                                | Married              | 168(94.9%)  | 167(94.4%)     | 1       |                    |
| Occupational status of mother  | Unemployed           | 128(72.3%)  | 111(62.7%)     | .054    | 1.553(0.99-2.432)  |
|                                | Employed             | 49(27.7%)   | 66(37.3%)      | 1       |                    |
| Occupational status of husband | Unemployed           | 62(36%)     | 41(23.4%)      | .011    | 1.842(1.153-2.942) |
|                                | Employed             | 110(64%)    | 134(76.6%)     | 1       |                    |
| Educational status of mother   | Can't read and write | 44(24.9%)   | 16(9%)         | .000    | 4.583(2.284-9.197) |
|                                | primary (1-8)        | 94(53.1%)   | 96(54.2%)      | .002    | 2.809(1.482-5.321) |

| Variables                     | Categories                 | Case n= 177 | Control n =177 | P-Value | COR(95% CI)        |
|-------------------------------|----------------------------|-------------|----------------|---------|--------------------|
|                               | Secondary (9-12) and above | 39(22%)     | 65(36.7%)      | 1       |                    |
| Educational status of husband | Can't read and write       | 26(15.1%)   | 15(8.6%)       | .002    | 3.026(1.485-6.164) |
|                               | primary (1-8)              | 87(50.6%)   | 57(32.6%)      | .728    | 1.136(0.554-2.328) |
|                               | secondary (9-12) and above | 59(34.3%)   | 103(58.9%)     | 1       |                    |
| Socio economic status         | Poorest                    | 56(31.6%)   | 68(38.4%)      | .322    | 1.495(0.898-2.486) |
|                               | Moderate                   | 57(32.2%)   | 57(32.2%)      | .432    | 1.231(0.733-2.067) |
|                               | Wealthiest                 | 64(36.2%)   | 52(29.4%)      | 1       |                    |

## Knowledge status of respondents about ANC

Seventy-seven (43.5%) of cases and 37(20.9%) controls have poor knowledge about ANC. Proportion of moderate knowledge among cases and controls was 67(37.9%) and 76 (42.9%) respectively. Thirty three (18.6%) of cases and 64(36.2%) of controls have good knowledge about ANC (Figure 2).

**Figure 2: Knowledge status of mothers among case and control groups, Jimma Town, South West Ethiopia, 2021**

## Maternal and obstetric characteristics of respondents

Proportion of multigravida among cases and controls was 112(63.3%) and 81(45.8%) respectively. Sixty five (36.7%) of cases and 96(54.2%) controls were primi-gravida. Mothers were asked if they have had history of abortion and 18(16.1%) of cases and 28(34.6%) controls reported history of abortion. Concerning place of delivery for the last previous pregnancy, 25(23.6%) of cases and 7(10%) of controls gave birth at their home. Three fourth 133(75.1%) of cases and 68(38.4%) of controls recognized their pregnancy through missed period. Regarding revealing being pregnant to others, 137(77.4%) of cases and 169(95.5%) of controls revealed their pregnancy (Table 2).

*Table 2: Bivariable Analysis of Maternal and Obstetric factors associated with late ANC initiation, in Jimma town, South West Ethiopia, 2021.*

| Variables | Category     | Case (n=177) | Control(n=177) | P-Value | COR(95% CI)       |
|-----------|--------------|--------------|----------------|---------|-------------------|
| Gravidity | Multigravida | 112(63.3%)   | 81(45.8%)      | .001    | .490(0.320-0.749) |
|           | Primigravida | 65(36.7%)    | 96(54.2%)      | 1       |                   |

| Variables                                         | Category         | Case (n=177) | Control(n=177) | P-Value | COR(95% CI)         |
|---------------------------------------------------|------------------|--------------|----------------|---------|---------------------|
| History of abortion                               | No               | 94(83.9%)    | 53(65.4%)      | .003    | 2.759(1.396-5.452)  |
|                                                   | Yes              | 18(16.1%)    | 28(34.6%)      | 1       |                     |
| ANC history                                       | No               | 20(17.9%)    | 10(12.3%)      | .299    | 1.543(0.680-3.504)  |
|                                                   | Yes              | 92(82.1%)    | 71(87.7%)      | 1       |                     |
| Parity                                            | >=1              | 106(59.9%)   | 70(39.5%)      | .197    | 1.492(0.813-2.739)  |
|                                                   | Parity 0         | 71(40.1%)    | 107(60.5%)     | 1       |                     |
| Place of delivery for the last previous pregnancy | Home             | 25(23.6%)    | 7(10%)         | .026    | 2.778(1.129-6.835)  |
|                                                   | Health facility  | 81(76.4%)    | 63(90%)        | 1       |                     |
| Pregnancy status (planned/unplanned)              | No               | 66(37.3%)    | 17(9.6%)       | .000    | 5.596(3.116-10.050) |
|                                                   | Yes              | 111(62.7%)   | 160(90.4%)     | 1       |                     |
| Revealing being pregnancy to others               | No               | 40(22.6%)    | 8(4.5%)        | .000    | 6.168(2.794-13.615) |
|                                                   | Yes              | 137(77.4%)   | 169(95.5%)     | 1       |                     |
| Pregnancy recognition means                       | By missed period | 133(75.1%)   | 68(38.4%)      | .000    | 4.845(3.071-7.644)  |
|                                                   | By Urine test    | 44(24.9%)    | 109(61.6)      | 1       |                     |
| Current pregnancy related pain before initiation  | Yes              | 87(49.2%)    | 48(27.1%)      | .000    | 2.598(1.667-4.048)  |
|                                                   | No               | 90(50.8%)    | 129(72.9%)     | 1       |                     |
| GA of pregnancy recognition                       | >=8 weeks        | 150(84.7%)   | 132(74.6%)     | .018    | 1.894(1.113-3.222)  |
|                                                   | <8 weeks         | 27(15.3%)    | 45(25.4%)      | 1       |                     |
| History of CS delivery                            | No               | 98(92.5%)    | 58(82.9%)      | .026    | 2.778(1.129-6.835)  |
|                                                   | Yes              | 8(7.5%)      | 12(17.1%)      | 1       |                     |

## Health service related factors

Regarding service quality, 82(46.3%) of cases and 84(47.5%) controls rated service quality as moderate. Fifty two (29.4%) and 29(16.4%) of cases and controls rated service quality as poor respectively. Concerning distance from health facility, 118(66.7%) of cases and 130(73.4%) of controls were near to health facility (Table 3).

Table 3: Bivariable Analysis of Health service related factors associated with late ANC initiation, in Jimma town, South West Ethiopia, 2021

| Variables                     | Category | Case (n=177) | Control (n=177) | P – value | COR (95% CI)       |
|-------------------------------|----------|--------------|-----------------|-----------|--------------------|
| Service quality               | Poor     | 52(29.4%)    | 29(16.4%)       | .001      | 2.669(1.470-4.845) |
|                               | Moderate | 82(46.3%)    | 84(47.5%)       | .029      | 1.837(1.063-3.173) |
|                               | Good     | 43(24.3%)    | 64(36.2%)       | 1         |                    |
| Distance from health facility | Far      | 59(33.3%)    | 47(26.6%)       | .164      | 1.383(0.876-2.184) |
|                               | Near     | 118(66.7%)   | 130(73.4%)      | 1         |                    |

## Socio-cultural characteristics

One hundred twenty-six (71.2%) of cases and 158 (89.3%) of controls made decisions to book for ANC follow up in consultation with their husbands. Regarding family support, 118(66.7%) of cases and 55(31.1%) controls came to health facility alone during ANC initiation (Table 4).

Table 4: Socio-cultural characteristics of respondents, Jimma Town, South West Ethiopia 2021

| Variables                       | Categories          | Case (n= 177) | Control (n= 177) | P-Value | COR (95%CI)        |
|---------------------------------|---------------------|---------------|------------------|---------|--------------------|
| Decision making to book for ANC | My Self             | 45(25.4%)     | 16(9%)           | .000    | 3.527(1.904-6.534) |
|                                 | with Other relative | 6(3.4%)       | 3(1.7%)          | .656    | 1.406(0.314-6.294) |
|                                 | with my husband     | 126(71.2%)    | 158(89.3%)       | 1       |                    |
| Family support                  | Alone               | 118(66.7%)    | 55(31.1%)        | .000    | 5.185(3.259-8.248) |
|                                 | with Other relative | 11(6.2%)      | 6(3.4%)          | .768    | 1.170(0.412-3.327) |
|                                 | with my husband     | 48(27.1%)     | 116(65.5%)       | 1       |                    |

## Determinants of late initiation of ANC follow-up

Mothers aged >25 years were 2.623 times more likely to initiate ANC follow-up late as compared to their counterparts (AOR= 2.623, 95% CI 1.059 - 6.496). Pregnant mothers who have poor knowledge about ANC were 3.856 times more likely to book late for ANC as compared to those who have had good knowledge (AOR= 3.856, 95% CI 1.266-11.750). Mothers who hadn't history of abortion were 3.326 times more likely to book late for ANC follow-up as compared to those who had an abortion history (AOR= 3.326, 95% CI 1.082 -10.224). Mothers who gave birth at their home during the last previous delivery were 3.9 times more likely to book late for ANC as compared to mothers who gave birth at health facility (AOR=3.926, 95%CI 1.023-15.063).

Pregnant mothers who recognized their pregnancy by missed period were 3.631 times more likely to book late for ANC follow-up as compared to those recognized by urine test (AOR= 3.631, 95% CI 1.520-8.674). Mothers who wait until they feel ill of pregnancy were 3.499 times more likely to book late for ANC follow-up as compared to those who initiated without feeling pain of pregnancy (AOR= 3.499, 95% CI 1.423 - 8.603). Mothers who came to health facilities alone during ANC booking were 2.647 times more likely to initiate late for ANC follow up as compared to those came with their husbands (AOR=2.647, 95% CI 1.092 - 6.415) (Table 5).

278

279 *Table 5: Independent predictors of late ANC initiation, Jimma Town, South West Ethiopia 2021*

| Variables                                                                                        | Case(n=177) | Control(n=177) | COR (95% CI)         | AOR (95% CI)          |
|--------------------------------------------------------------------------------------------------|-------------|----------------|----------------------|-----------------------|
| <b>Age of mother</b>                                                                             |             |                |                      |                       |
| >25                                                                                              | 96(54.2%)   | 43(24.3%)      | 3.693 (2.347-5.811)* | 2.623(1.059-6.496)**  |
| ≤25                                                                                              | 81(45.8%)   | 134(75.7%)     | 1                    |                       |
| <b>Knowledge about ANC</b>                                                                       |             |                |                      |                       |
| Poor Knowledge                                                                                   | 77(43.5%)   | 37(20.9%)      | 4.036(2.272-7.170)*  | 3.856(1.266-11.750)** |
| Moderate Knowledge                                                                               | 67(37.9%)   | 76(42.9%)      | 2.361(1.415-3.937)*  | 1.98(0.424-3.381)     |
| Good Knowledge                                                                                   | 33(18.6%)   | 64(36.2%)      | 1                    |                       |
| <b>History of abortion</b>                                                                       |             |                |                      |                       |
| No                                                                                               | 94(83.9%)   | 53(65.4%)      | 2.759 (1.396-5.452)* | 3.326(1.082-10.224)** |
| Yes                                                                                              | 18(16.1%)   | 28(34.6%)      | 1                    |                       |
| <b>Place of delivery for the last previous pregnancy</b>                                         |             |                |                      |                       |
| Home                                                                                             | 25(23.6%)   | 7(10%)         | 2.778 (1.129-6.835)* | 3.926(1.023-15.063)** |
| Health facility                                                                                  | 81(76.4%)   | 63(90%)        | 1                    |                       |
| <b>Pregnancy recognition Means</b>                                                               |             |                |                      |                       |
| By missed period                                                                                 | 133(75.1%)  | 68(38.4%)      | 4.845 (3.071-7.664)* | 3.631(1.520-8.674)**  |
| By Urine test                                                                                    | 44(24.9%)   | 109(61.6)      | 1                    |                       |
| <b>Current pregnancy related pain before initiation</b>                                          |             |                |                      |                       |
| Yes                                                                                              | 87(49.2%)   | 48(27.1%)      | 2.598 (1.667-4.048)* | 3.499(1.423-8.603)**  |
| No                                                                                               | 90(50.8%)   | 129(72.9%)     | 1                    |                       |
| <b>Family support</b>                                                                            |             |                |                      |                       |
| Alone                                                                                            | 118(66.7%)  | 55(31.1%)      | 5.185(3.259-8.248)*  | 2.647 (1.092-6.415)** |
| with Other relative                                                                              | 11(6.2%)    | 6(3.4%)        | 1.170(0.412-3.327)   | 1.323(0.133-13.139)   |
| with my husband                                                                                  | 48(27.1%)   | 116(65.5%)     | 1                    |                       |
|                                                                                                  |             |                |                      |                       |
| *Significant variables in bivariable analysis, **Significant variables in Multivariable analysis |             |                |                      |                       |

## 280 Discussion

281 The current study showed that, being age > 25 years, poor knowledge about ANC, lack of  
 282 history of abortion, previous home delivery, recognizing pregnancy through missed period,  
 283 current pregnancy related pain before initiation, and lack of family support during  
 284 ANC booking were determinants of late ANC initiation.

285

286 Pregnant mothers aged >25 were 2.6 times more likely to book late for ANC follow-up as  
 287 compared to their counterparts. This result is consistent with the studies done in  
 288 Debremarkos, Kembata, and East Wellega, Ethiopia (5,25,26). The reason might be due to  
 289 that young women have more health seeking behaviour and information about the importance  
 290 of early antenatal care booking than older women.

Pregnant mothers who have had poor Knowledge about ANC were 3.38 times more likely to book late for ANC follow up as compared to those who have had good knowledge. This finding is in line with the study conducted in Tigray, Ethiopia (24). This could be explained by the fact that mothers with poor knowledge might not have awareness about the correct time for ANC booking, frequency of ANC visits, and the importance of ANC follow up both for the mother and the foetus. In the current study, pregnant mothers who had no history of abortion were 3.3 times more likely to book late for ANC follow up as compared to their counterparts. The study finding is supported by the study done in the United Arab Emirates and in Ethiopia(20,28). It could be explained by the fact that, mothers who have a history of abortion were more likely to initiate early for ANC follow up due to fear of recurrence of the event as well as they might got information about ANC follow up.

The finding showed that, mothers who gave birth at their home during the last previous delivery were 3.9 times more likely to book late for ANC follow up as compared to those who gave birth at health institution during previous delivery. This finding is in line with the study conducted in Ethiopia (21). It might be due to mothers who gave birth at the health facility during previous delivery benefitted and get information about ANC follow up and appropriate booking time. Mothers who recognized their pregnancy through missed period were 3.6 times more likely to book for ANC late as compared to mothers who recognized their pregnancy by urine test. Similar finding was also reported in studies conducted in North Ethiopia (5,29,30). Mothers who recognize their pregnancy through urine test might be more likely to practice health care seeking and more likely to accept modern medical care follow up than those who recognized via missed period. On the other hand, mothers who recognized pregnancy by missed period were most probably after missing one or two cycles and thereafter, they might be reluctant to start ANC soon(29).

Pregnant mothers who wait until they feel ill of pregnancy to start ANC follow up were about 3.5 times more likely to book for ANC follow up late as compared to their counterparts. This finding is consistent with the study conducted in Addis Ababa, Ethiopia(31). The possible explanation could be due to the wrong perception of ANC follow up as a curative rather than preventive and waiting pregnancy related medical problem to book for ANC. Pregnant mothers who came alone to health facilities during ANC booking were 2.64 more likely to initiate ANC follow up lately as compared to those accompanied by their husbands. This finding is supported by the study done in Tanzania and Ethiopia (9,19,32). This could be due

to a lack of encouragement from husbands, which may deter women from obtaining early ANC care.

The current study showed that, family size, parity, pregnancy status and revealing being pregnancy to others were not significantly associated with late ANC booking. Family size has no statistically significant relationship with late ANC booking. The result is different from the study conducted in sub-Saharan Africa and Cameroon (33,34). It might be due to difference in socio demographic characteristics of the study participants in two study areas.

Contrary to study conducted in Cameroon and Boke Woreda, Ethiopia(18,36) parity was not shown to be linked with late ANC initiation. It might be due to the distribution of multipara and nulliparous among cases and controls were nearly similar and hidden the impacts of parity on late ANC follow up initiation. Pregnancy status was another insignificant variable in the current study. In contrast, the finding is different from studies conducted in Kembata and Gonder, Ethiopia(25,27) In the current study, the majority of respondents were married and probability of unplanned pregnancy is low. So that, fewer unplanned pregnancies among participants was the reason.

### **Limitations**

Misclassification bias might also be introduced since gestational age was determined using LMP based on the women's memory. In addition, the current study focused solely on public health centers in Jimma town, with no mentions of public hospitals, private clinics, or private hospitals.

### **Conclusion and recommendations**

The study identified that, being age > 25 years, poor knowledge about ANC, previous home delivery, recognizing pregnancy through missed period, current pregnancy related pain before initiation, and lack of family support during ANC booking were determinants of late ANC initiation in the current study. Health care providers should provide health education at facility level regularly with due attention to late initiation of ANC, eligibility of all pregnant mothers regardless of feeling pregnancy related medical problems. While providing health education, special consideration should be given for mothers aged > 25 years.

## Acknowledgment

We would like to express our heartfelt appreciation to all participants of the study, Jimma University, and Jimma town health office for their unwavering support and dedication.

## Author Contributions

Conceptualization: Mohammed Jihad, Kifle Woldemichael & Yenealem Gezehagn  
 Data curation: Mohammed Jihad.  
 Formal analysis: Mohammed Jihad  
 Funding acquisition: Mohammed Jihad.  
 Investigation: Mohammed Jihad, Kifle Woldemichael & Yenealem Gezehagn  
 Methodology: Mohammed Jihad, Kifle Woldemichael & Yenealem Gezehagn  
 Project administration: Mohammed Jihad.  
 Resources: Mohammed Jihad  
 Supervision: Mohammed Jihad, Kifle Woldemichael & Yenealem Gezehagn  
 Visualization: Mohammed Jihad, Kifle Woldemichael & Yenealem Gezehagn  
 Writing – original draft: Mohammed Jihad, Kifle Woldemichael & Yenealem Gezehagn  
 Writing – review & editing: Kifle Woldemichael & Yenealem Gezehagn

## References

1. WHO. WHO ANC Randomized trial: Manual for the implementation of the new Model, World Health Organization, Geneva, 2002.
2. Lincetto O, Mothebesoane S, Gomez P MS. Opportunities for Africa's Newborns. *Revue de l'infirmière*. 2015. p. 45–6.
3. Ethiopian Public Health Institute (EPHI) [Ethiopia] and ICF. Ethiopia Mini Demographic and Health Survey 2019: Key Indicators. Vol. 53, *Journal of Chemical Information and Modeling*. 2019. 1689–1699 p.
4. WHO. World Health Organization (WHO). WHO Recommendations on Antenatal Care for a Positive Pregnancy Experience: Summary. Geneva, Switzerland: WHO; 2018. Licence: CC BY-NC-SA 3.0 IGO. WHO/RHR/18.01. Vol. 1. 2018.
5. Wolde F, Mulaw Z, Zena T, Biadgo B, Limenih MA. Determinants of late initiation for antenatal care follow up: the case of northern Ethiopian pregnant women. *BMC Res Notes* [Internet]. 2018;1–7. Available from: <https://doi.org/10.1186/s13104-018-3938-9>

- 387 6. Emiru AA. Women ' s retention on the Continuum of Maternal Care Pathway in West  
388 Gojjam Zone , Ethiopia□: Multilevel Analysis. BMC Pregnancy Childbirth. 2018;1–  
389 32.
- 390 7. Tesfaye G, Loxton D, Chojenta C, Semahegn A, Smith R. Delayed initiation of  
391 antenatal care and associated factors in Ethiopia: A systematic review and meta-  
392 analysis. Reprod Health. 2017;14(1).
- 393 8. Gebremeskel F, Dibaba Y, Admassu B. Timing of First Antenatal Care Attendance  
394 and Associated Factors among Pregnant Women in Arba Minch Town and Arba  
395 Minch District, Gamo Gofa Zone, South Ethiopia. J Environ Public Health. 2015;
- 396 9. Weldemariam S, Damte A, Endris K, Palcon MC, Tesfay K, Berhe A. Late antenatal  
397 care initiation□: the case of public health centers in Ethiopia. BMC Res Notes  
398 [Internet]. 2018;1–6. Available from: <https://doi.org/10.1186/s13104-018-3653-6>
- 399 10. World Health Organization. Trends in maternal mortality: 1990 to 2013. Estimates by  
400 WHO, UNICEF, UNFPA, The World Bank and the United Nations Population  
401 Division. WHO. 2014.
- 402 11. Central Statistical Agency [Ethiopia]. 2014. Ethiopia Mini Demographic and Health  
403 Survey 2014. Addis Ababa, Ethiopia.
- 404 12. Central Statistical Agency (CSA) [Ethiopia] and ICF. 2016. Ethiopia Demographic and  
405 Health Survey 2016. Addis Ababa, Ethiopia, and Rockville, Maryland, USA: CSA and  
406 ICF. [Internet]. 2017. Available from:  
407 <https://dhsprogram.com/pubs/pdf/FR328/FR328.pdf>
- 408 13. Villadsen SF, Tersbøl BP, Negussie D, Gebremariam A, Tilahun A, Friis H, et al.  
409 Antenatal Care Strengthening in Jimma , Ethiopia□: A Mixed-Method Needs  
410 Assessment. J Environ Public Health. 2014;2014.
- 411 14. Emelumadu et al: Socio-Demographic Determinants of Maternal Health-Care Service  
412 Utilization Among Rural Women in Anambra State , South East Nigeria. Ann Med  
413 Health Sci Res. 2014;4(3).
- 414 15. Govender T, Reddy P, Ghuman S. Obstetric outcomes and antenatal access among  
415 adolescent pregnancies in KwaZulu-Natal , South Africa. South African Fam Pract  
416 [Internet]. 2018;60(1):1–7. Available from:  
417 <http://doi.org/10.1080/20786190.2017.1333783>
- 418 16. WHO Maternal and reproductive health report:[https://www.who.int/data/gho/data](https://www.who.int/data/gho/data/themes/maternal-and-reproductive-health)  
419 themes/maternal-and-reproductive-health. 2021.
- 420 17. Trends in maternal mortality 2000 to 2017: estimates by WHO, UNICEF, UNFPA,

- World Bank Group and the United Nations Population Division. Geneva. 2019.
18. Yarinbab TE, Gedle MW. Determinants of Antenatal Care Service Utilization during the First Trimester among Pregnant Women in Boke Woreda , Ethiopia□: A Facility Based Unmatched Case Control Study. Curr Trends Biomed Eng Biosci. 2018;15(1).
19. Weldearegawi GG, Teklehaimanot BF, Gebru HT. Determinants of late antenatal care follow up among pregnant women in Easter zone Tigray , Northern Ethiopia , 2018□: unmatched case – control study. BMC Res Notes [Internet]. 2019;12(752). Available from: <https://doi.org/10.1186/s13104-019-4789-8>
20. Ali N, Elbarazi I, Alabboud S, Al-maskari F, Loney T. Antenatal Care Initiation Among Pregnant Women in the United Arab Emirates□: The Mutaba ' ah Study. Front Public Heal. 2020;8(211).
21. Grum T, Brhane E. Magnitude and factors associated with late antenatal care booking on first visit among pregnant women in public health centers in central zone of Tigray Region , Ethiopia□: A cross sectional study. PLoS One. 2018;13(12).
22. Ewunetie AA, Munea AM, Meselu BT, Simeneh MM, Meteku BT. DELAY on first antenatal care visit and its associated factors among pregnant women in public health facilities of Debre Markos. BMC Pregnancy Childbirth. 2018;18(173).
23. Baguiya A, Coulibaly A, Bagnoa V. Prevalence and Factors Associated with Late First Antenatal Care Visit in Kaya Health District , Burkina Faso. Afr J Reprod Health. 2020;24(2).
24. Kahasse G and Alemayehu W. Factors associated with late ANC initiation among pregnant women in select public health centers of Addis Ababa , Ethiopia□: unmatched case – control study design. Pragmatic Obs Res. 2017;8.
25. Tesfalidet T; Balcha B. Factors Associated with Late Initiation of Antenatal Care among Pregnant Women Attending Antenatal Clinic at Public Health Centers in Kembata Tembaro Zone, Southern Ethiopia. Sci Technol Arts Res J. 2014;3(2).
26. Eyasu E, Regea D, Olifan Z and EM. Factors determining late antenatal care booking and the content of care among pregnant mother attending antenatal care services in East Wollega administrative zone, West Ethiopia. Pan African Med Journa. 2017;
27. Wolde HF, Tsegaye AT, Sisay MM. Late initiation of antenatal care and associated factors among pregnant women in Addis Zemen primary hospital , South. 2019;1–8.
28. Wondwossen L , Abrehet K MT. Magnitude and Associated Factors of Late Booking for Antenatal Care in Public Clinics in Mother and Child Health. 2015;12(1):1–8.
29. Gudayu TW. Proportion and Factors Associated with late Antenatal Care Booking

- among Pregnant Mothers in Gondar Town , North West Ethiopia. *Afr J Reprod Health*. 2015;19(2).
30. Girma T, Seyoum D RT. Factors Associated with Timely Antenatal Care Booking Among Pregnant Women in Remote Area of Bule Hora District , Southern Ethiopia. *Int J Women's Heal*. 2020;12.
  31. Hanna G, Gulema H, Berhane Y. Timing of First Antenatal Care Visit and its Associated Factors among Pregnant Women Attending Public Health Facilities in Addis Ababa, Ethiopia. *Ethiop J Health Sci*. 2017;27(1).
  32. Gross K, Alba S, Glass TR, Schellenberg JA, Obrist B. Timing of antenatal care for adolescent and adult pregnant women in south-eastern Tanzania. *BMC Pregnancy Childbirth* [Internet]. 2012;12(1):16. Available from: <http://www.biomedcentral.com/1471-2393/12/16>
  33. Njamen TN, Tchounzou R, Tamambang R, Ngowe MN. Determinants Of Delayance In The First Antenatal Consultation In A District Hospital In Sub Saharan Africa. *African J Integr Heal*. 2017;7(2).
  34. Tolefac PN, Halle-ekane GE, Agbor VN, Sama CB, Ngwasiri C, Tebeu PM. Why do pregnant women present late for their first antenatal care consultation in Cameroon? *Matern Heal Neonatol Perinatol*. 2017;
  35. Ebonwu J, Mumbauer A, Uys M, Wainberg ML, Medina- A. Determinants of late antenatal care presentation in rural and peri-urban communities in South Africa: A cross-sectional study. *PLoS One*. 2018;13(3).
  36. Venyuy MA, Cumber SN, Nkfusai CN, Bede F, Ijang YP, Wepngong E, et al. Determinants to late antenatal clinic start among pregnant women: the case of Saint Elizabeth General Hospital, Shisong, Cameroon. *Pan African Med Journa*. 2020;35(112).

## Figures

[S1 Fig](#). Proportional allocation of sample size among health centers in Jimma Town, 2021

[S2 Fig](#). Knowledge status of the mothers among case and control groups, Jimma Town, 2021

## Supporting information

All data will be available from correspondence author based up on request.

## Health Centers in Jimma town

JimmaHC

Higher Two  
HC

Mendera Kochi  
HC

Becho Bore  
HC

Average three  
month's Cases= 46

Average three  
month's Cases= 125

Average three  
month's Cases= 38

Average three  
month's Cases= 79

Proportional allocation of sample size based on average three month's cases flow

Cases for JHC =  
 $46/288 \times 177 = 28$

Cases for H2HC=  
 $125/288 \times 177 = 77$

Cases for MKHC=  
 $38/288 \times 177 = 23$

Cases for BBHC  
 $= 79/288 \times 177 = 49$

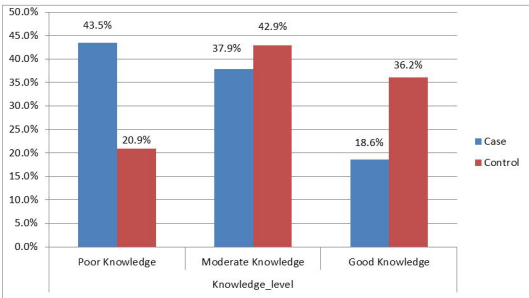

Source: https://medrxiv.org/content/10.1101/2022.01.20.22269582v1.full.pdf
